# Supplementary material for: Conventional and Zero Tillage with Residue Management in Rice–Wheat System in the Indo-Gangetic Plains: Impact on Thermal Sensitivity of Soil Organic Carbon Respiration and Enzyme Activity
Source: MDPI journal article supplement (doi:10.3390/ijerph20010810), 2023-01-01
Supplement: s1 [file s1]

**Supplementary Table S1:** Initial soil properties (0–15 cm) of the experimental site

| Variables                                  | Value      |
|--------------------------------------------|------------|
| Texture                                    | Sandy-loam |
| Bulk density ( $\text{Mg m}^{-3}$ )        | 1.5        |
| Soil pH (1:2.5 $\text{H}_2\text{O}$ )      | 7.2        |
| Organic carbon ( $\text{g kg}^{-1}$ )      | 6.5        |
| CEC <sup>#</sup> ( $\text{Cmol kg}^{-1}$ ) | 39         |
| Available N ( $\text{kg ha}^{-1}$ )        | 112        |
| Available P ( $\text{kg ha}^{-1}$ )        | 3.9        |
| Available K ( $\text{kg ha}^{-1}$ )        | 102.5      |
| DTPA <sup>§</sup> extractable Zn (ppm)     | 0.25       |
| DTPA extractable Cu (ppm)                  | 0.05       |
| DTPA extractable Fe (ppm)                  | 0.6        |
| DTPA extractable Mn (ppm)                  | 0.4        |

<sup>#</sup>CEC = Cation exchange capacity; <sup>§</sup>DTPA = Di-ethylene triamine pentaacetate
